# Supplementary material for: Promoting effect of tungsten carbide on the catalytic activity of Cu for CO2reduction
Source: Royal Society of Chemistry journal article supplement (doi:10.1039/d0cp00358a), 2020-01-01
Supplement: d0cp00358a1.pdf [file d0cp00358a1.pdf]

**Supplemental information for the article “Promoting effect of tungsten carbide on catalytic activity of Cu for CO<sub>2</sub> reduction”**

**Andrey A. Koverga<sup>a,b</sup>, Elizabeth Flórez<sup>b</sup>, Ludovic Dorkis<sup>a</sup>, José A. Rodríguez<sup>c</sup>**

<sup>a</sup>Universidad Nacional de Colombia sede Medellín, Facultad de Minas, Departamento de Materiales y Minerales, Grupo de Investigación en Catálisis y Nanomateriales, Medellín, Colombia

<sup>b</sup>Universidad de Medellín, Facultad de Ciencias Básicas, Grupo de Investigación Mat&mpac, Medellín, Colombia

<sup>c</sup>Chemistry Department, Brookhaven National Laboratory, Upton, NY, United States

Table S1. Initial site and its location (SL), final site, adsorption energies ( $E_{ads}$ ), adsorption energy on the same site of the corresponding pristine surface ( $E_{ads,Cu}/E_{ads,Wc}$ ), CO carbon–nearest surface atom distance ( $d$  (C-Surface)), shortest C–surface distance ( $d_{\perp}$  (C-Surface)), C-O bond length ( $d(CO)$ ) and Bader charge for CO on Cu/WC(0001)

| Surface               | SL          | Initial site          | Final site <sup>a</sup> | $E_{ads}$ (eV) | $E_{ads,Cu}/E_{ads,Wc}$ (eV) | $d$ (C-Surface) (Å)* | $d_{\perp}$ (C-Surface) (Å)* | $d(C-O)$ (Å)* | Q (e) |
|-----------------------|-------------|-----------------------|-------------------------|----------------|------------------------------|----------------------|------------------------------|---------------|-------|
| Cu <sub>M</sub> /C-WC | Cu          | Top                   | Top                     | -1.48          | -1.03                        | 1.81                 | 1.78                         | 1.16          | -0.14 |
|                       |             | Bridge                | <i>Ehcp</i>             | -1.22          | -1.16                        | 2.07                 | 1.30                         | 1.19          | –     |
|                       |             | <i>Chcp</i>           | Top                     | -1.49          | -1.03                        | 1.81                 | 1.78                         | 1.16          | –     |
|                       |             | <i>Ehcp</i>           | <i>Ehcp</i>             | -1.22          | -1.16                        | 2.07                 | 1.30                         | 1.19          | –     |
| Cu <sub>M</sub> /W-WC | Cu          | Top                   | Top                     | -1.66          | -1.03                        | 1.84                 | 1.82                         | 1.16          | –     |
|                       |             | Bridge                | <i>Ehcp</i>             | -1.72          | -1.16                        | 2.08                 | 1.45                         | 1.19          | –     |
|                       |             | <i>Whcp</i>           | <i>Whcp</i>             | -1.52          | -1.15                        | 2.06                 | 1.42                         | 1.19          | –     |
|                       |             | <i>Ehcp</i>           | <i>Ehcp</i>             | -1.72          | -1.16                        | 2.08                 | 1.45                         | 1.19          | -0.40 |
| Cu <sub>4</sub> /C-WC | Cu          | Top                   | Top (DS)                | -1.66          | -1.03                        | 1.79                 | 1.79                         | 1.16          | –     |
|                       |             | Bridge                | Bridge (DS)             | -1.41          | -1.03                        | 1.97                 | 1.45                         | 1.18          | –     |
|                       |             | <i>Chcp</i>           | Top-C of WC             | -2.15          | -2.92                        | 1.43                 | 1.29                         | 1.26          | -0.45 |
|                       |             | <i>Ehcp</i>           | Bridge (DS)             | -1.44          | -1.16                        | 1.97                 | 1.45                         | 1.18          | –     |
|                       |             | 4-fold                | Top (DS)                | -1.66          | -1.03                        | 1.79                 | 1.79                         | 1.16          | –     |
|                       | WC          | Top-1                 | Top-1 (DS)              | -2.76          | -2.92                        | 1.32                 | 1.32                         | 1.18          | -0.30 |
|                       |             | Top-2                 | Top-2 (DS)              | -2.97          | -2.92                        | 1.31                 | 1.31                         | 1.18          | –     |
|                       |             | Bridge-1              | Bridge-1 (DS)           | -2.48          | -1.95                        | 1.46                 | 0.70                         | 1.44          | –     |
|                       |             | Bridge-2              | <i>Whcp</i> (DS)        | -3.39          | -3.64                        | 1.46                 | 0.60                         | 1.45          | –     |
|                       |             | Bridge-3              | <i>Whcp</i> (DS)        | -3.17          | -3.64                        | 1.51                 | 0.66                         | 1.44          | –     |
|                       |             | Bridge-4              | <i>Whcp</i> (DS)        | -3.39          | -3.64                        | 1.46                 | 0.60                         | 1.45          | –     |
|                       |             | <i>Whcp</i>           | <i>Whcp</i> (DS)        | -3.39          | -3.64                        | 1.46                 | 0.60                         | 1.45          | -0.57 |
|                       |             | <i>Ehcp</i>           | Bridge-2                | -2.63          | -1.95                        | 1.52                 | 0.91                         | 1.23          | –     |
|                       |             | Cu <sub>4</sub> /W-WC | Cu                      | Top            | Top                          | -1.35                | -1.03                        | 1.83          | 1.49  |
| Bridge                | Top         |                       |                         | -1.35          | -1.03                        | 1.82                 | 1.47                         | 1.16          | –     |
| <i>Whcp</i>           | <i>Whcp</i> |                       |                         | -1.11          | -1.15                        | 1.97                 | 1.40                         | 1.19          | –     |
| <i>Ehcp</i>           | <i>Ehcp</i> |                       |                         | -1.32          | -1.16                        | 2.02                 | 1.40                         | 1.19          | –     |
| 4-fold                | <i>Whcp</i> |                       |                         | -1.11          | -1.15                        | 1.97                 | 1.40                         | 1.19          | –     |
| WC                    | Top-1       |                       | Top-1                   | -2.17          | -2.12                        | 2.04                 | 2.04                         | 1.17          | –     |
|                       | Top-2       |                       | <i>Ehcp</i>             | -2.02          | –                            | 2.06                 | 1.42                         | 1.34          | –     |
|                       | Bridge-1    |                       | Top-1 (DS)              | -2.12          | -2.12                        | 2.04                 | 1.41                         | 1.26          | –     |
|                       | Bridge-2    |                       | <i>Ehcp</i>             | -2.02          | –                            | 2.06                 | 1.42                         | 1.34          | –     |
|                       | Bridge-3    |                       | Top-1                   | -2.20          | -2.12                        | 2.06                 | 2.06                         | 1.18          | –     |
|                       | Bridge-4    |                       | Bridge-4                | -2.24          | -2.39                        | 2.06                 | 1.40                         | 1.24          | -0.87 |
|                       | <i>Chcp</i> |                       | Top-1                   | -2.20          | -2.12                        | 2.06                 | 2.06                         | 1.18          | –     |
|                       | <i>Ehcp</i> |                       | <i>Ehcp</i>             | -2.02          | –                            | 2.06                 | 1.42                         | 1.34          | –     |

<sup>a</sup>DS stands for significantly distorted geometry of the Cu particle

Table S2. Initial site and its location (SL), final site, adsorption energies ( $E_{ads}$ ), adsorption energy on the same site of the corresponding pristine surface ( $E_{ads,Cu}/E_{ads,WC}$ ), CO carbon–nearest surface atom distance ( $d$  (C-Surface)), shortest C–surface distance ( $d_{\perp}$  (C-Surface)), C-O bond length ( $d(CO)$ ), O-C-O inner angle ( $\angle$  (O-C-O)) and Bader charge for  $CO_2$  on Cu/WC(0001)

| Surface   | SL | Initial site | Final site <sup>a</sup> | E <sub>ads</sub> (eV) | $E_{ads,Cu}/E_{ads,WC}$ (eV) | $d$ (C-Surface) (Å) <sup>*</sup> | $d_{\perp}$ (C-Surface) (Å) <sup>*</sup> | $d$ (C-O) (Å) <sup>*</sup> | $\angle$ (O-C-O) <sup>o</sup> | Q (e) |
|-----------|----|--------------|-------------------------|-----------------------|------------------------------|----------------------------------|------------------------------------------|----------------------------|-------------------------------|-------|
| CuML/C-WC | Cu | Top          | Desorption              |                       |                              |                                  |                                          |                            |                               |       |
|           |    | Bridge       | Desorption              |                       |                              |                                  |                                          |                            |                               |       |
|           |    | Chcp         | Chcp                    | -0.32                 | –                            | 1.99                             | 1.43                                     | 1.27                       | 126.2                         | -0.80 |
|           |    | Ehcp         | Desorption              |                       |                              |                                  |                                          |                            |                               |       |
| CuML/W-WC | Cu | Top          | Bridge                  | -0.43                 | –                            | 2.06                             | 1.68                                     | 1.25                       | 137.6                         | –     |
|           |    | Bridge       | Bridge                  | -0.43                 | –                            | 2.05                             | 1.68                                     | 1.24                       | 137.5                         | –     |
|           |    | Whcp         | Whcp                    | -0.65                 | –                            | 1.96                             | 1.33                                     | 1.29                       | 122.5                         | -1.00 |
|           |    | Ehcp         | Ehcp                    | -0.62                 | –                            | 1.94                             | 1.27                                     | 1.29                       | 119.1                         | –     |
| Cu4/C-WC  | Cu | Top          | Desorption              |                       |                              |                                  |                                          |                            |                               |       |
|           |    | Bridge       | Bridge                  | -0.38                 | –                            | 1.99                             | 1.86                                     | 1.22                       | 135.5                         | –     |
|           |    | Chcp         | Top-C of WC             | -2.16                 | –                            | 1.50                             | 1.50                                     | 1.30                       | 118.2                         | -0.72 |
|           |    | Ehcp         | Ehcp                    | -0.38                 | –                            | 2.02                             | 1.34                                     | 1.28                       | 123.3                         | –     |
|           |    | 4-fold       | Top-C of WC             | -2.16                 | –                            | 1.49                             | 1.49                                     | 1.31                       | 117.8                         | –     |
|           | WC | Top-1        | Top-1                   | -1.41                 | –                            | 1.55                             | 1.55                                     | 1.27                       | 127.4                         | –     |
|           |    | Top-2        | Top-2 (DS)              | -2.19                 | –                            | 1.49                             | 1.47                                     | 1.29                       | 117.7                         | -0.69 |
|           |    | Bridge-1     | Desorption              |                       |                              |                                  |                                          |                            |                               |       |
|           |    | Bridge-2     | Desorption              |                       |                              |                                  |                                          |                            |                               |       |
|           |    | Bridge-3     | Desorption              |                       |                              |                                  |                                          |                            |                               |       |
|           |    | Bridge-4     | Top-2 (DS)              | -1.91                 | –                            | 1.52                             | 1.51                                     | 1.29                       | 119.2                         | –     |
|           |    | Whcp         | Top-2 (DS)              | -1.91                 | –                            | 1.52                             | 1.51                                     | 1.29                       | 119.2                         | –     |
|           |    | Ehcp         | Top-2 (DS)              | -2.27                 | –                            | 1.42                             | 1.33                                     | 1.30                       | 119.0                         | –     |
| Cu4/W-WC  | Cu | Top          | Desorption              |                       |                              |                                  |                                          |                            |                               |       |
|           |    | Bridge       | Ehcp                    | -0.41                 | –                            | 2.07                             | 1.48                                     | 1.25                       | 129.2                         | –     |
|           |    | Whcp         | Whcp                    | -0.61                 | –                            | 1.94                             | 1.33                                     | 1.30                       | 118.6                         | -1.03 |
|           |    | Ehcp         | Ehcp                    | -0.41                 | –                            | 2.06                             | 1.48                                     | 1.25                       | 128.9                         | –     |
|           |    | 4-fold       | Whcp                    | -0.61                 | –                            | 1.94                             | 1.31                                     | 1.30                       | 118.6                         | –     |
|           | WC | Top-1        | Dissociation            |                       |                              |                                  |                                          |                            |                               |       |
|           |    | Top-2        | Dissociation            |                       |                              |                                  |                                          |                            |                               |       |
|           |    | Bridge-1     | Bridge-1                | -1.80                 | –                            | 2.15                             | 1.78                                     | 1.30                       | 114.8                         | -1.34 |
|           |    | Bridge-2     | Desorption              |                       |                              |                                  |                                          |                            |                               |       |
|           |    | Bridge-3     | Chcp                    | -1.63                 | -1.56                        | 2.42                             | 1.66                                     | 1.34                       | 116.0                         | –     |
|           |    | Bridge-4     | Chcp                    | -1.56                 | -1.56                        | 2.26                             | 1.65                                     | 1.33                       | 116.2                         | –     |

|  |      |              |       |       |      |      |      |       |   |
|--|------|--------------|-------|-------|------|------|------|-------|---|
|  | Chcp | Chcp         | -1.62 | -1.56 | 2.42 | 1.66 | 1.34 | 116.0 | - |
|  | Ehcp | Dissociation |       |       |      |      |      |       |   |

<sup>a</sup>DS stands for significantly distorted geometry of the Cu particle

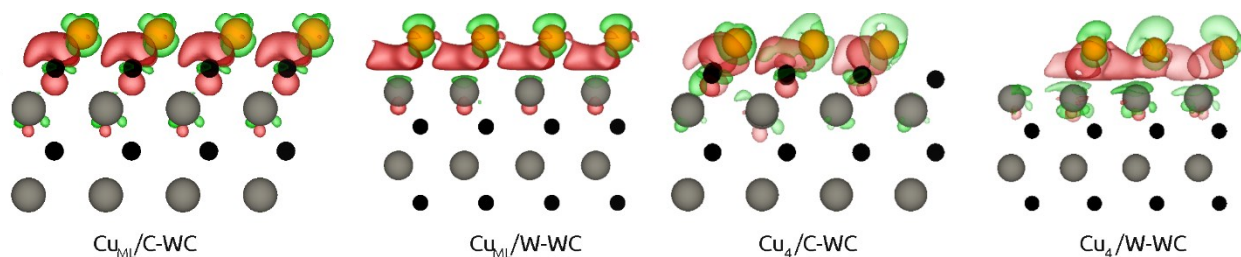

Figure S1. Charge density difference (CDD) plots for bare Cu/WC(0001) surfaces. Here green and red regions correspond to a charge loss (atoms become more positively charged) and charge accumulation (atoms become more negatively charged), respectively.

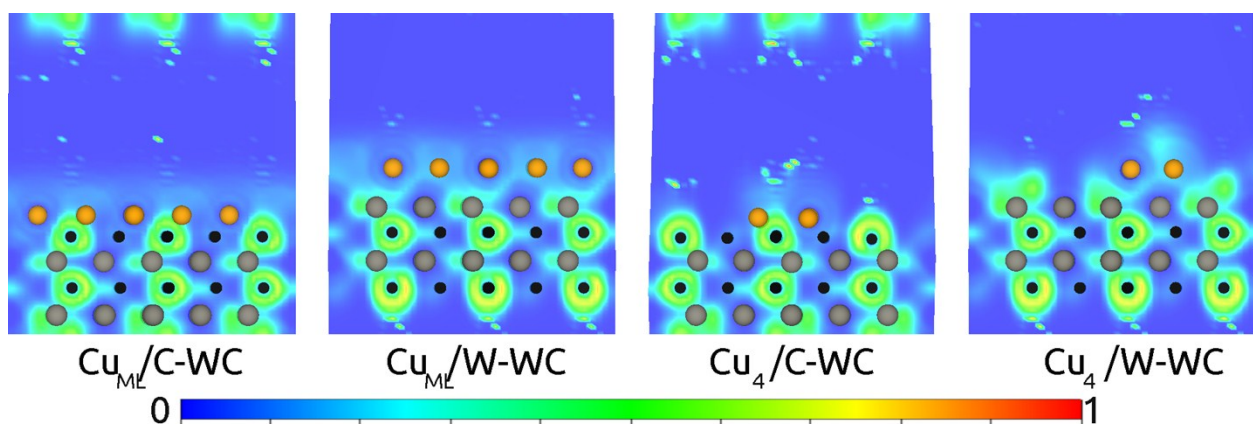

Figure S2. 2D plots of electron localization function (ELF) for bare Cu/WC(0001) surfaces. The probability of finding electron varies from 0 (blue) to 1 (red).

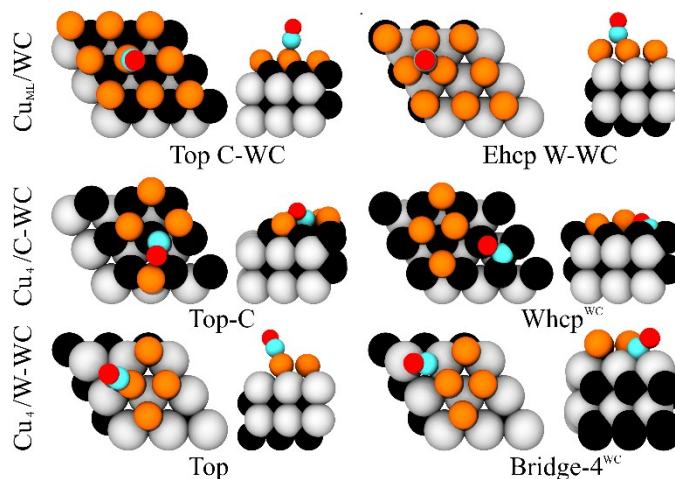

Figure S3. Top and side views of the most stable geometries for CO after its bonding on Cu/WC(0001) surfaces. The legend below each panel indicates the adsorption site. Sites located on the support are indicated with WC. CO carbon atoms are represented by cyan spheres, tungsten, carbon and copper atoms are represented by silver, black and orange spheres, respectively.

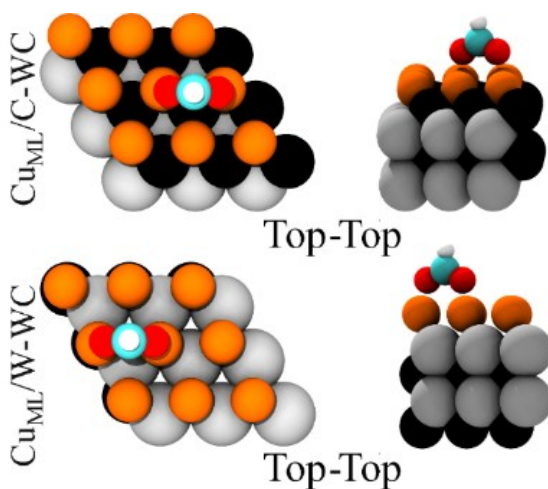

Figure S4. Top and side views for the most stable geometries of HCOO after its bonding on Cu<sub>ML</sub>/WC(0001) surfaces. The legend below each panel indicates the adsorption site. HCOO carbon atoms are represented by cyan spheres, the rest of the atoms are indicated the same as on Figure S3.

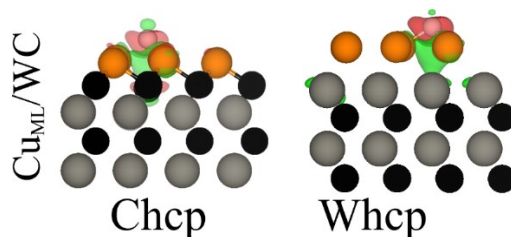

Figure S5. Charge density difference (CDD) plots for a H atom adsorbed on Cu<sub>ML</sub>/WC(0001) surfaces. Hydrogen atoms are indicated by white spheres. Charge difference color code is the same as on Figure S1.

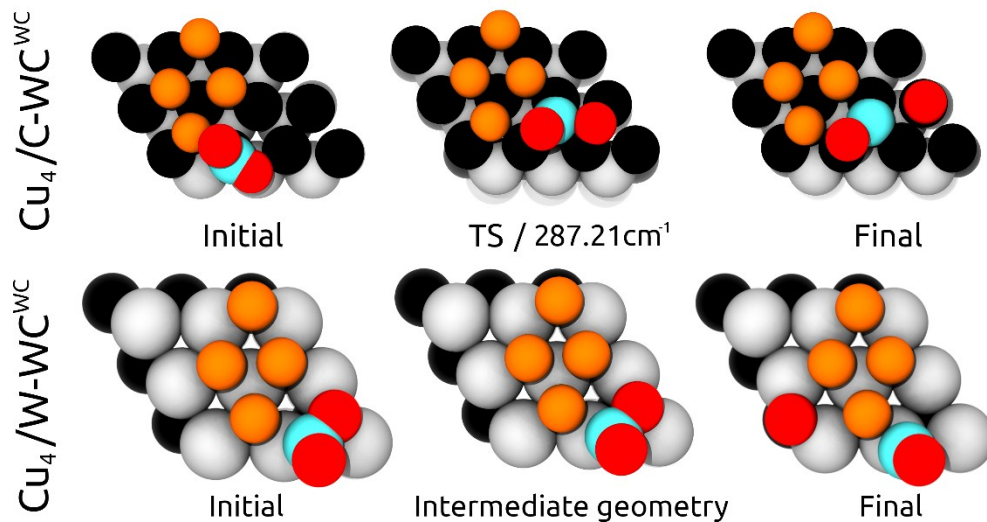

Figure S6. Initial, transition and final states geometries for direct CO<sub>2</sub> dissociation on WC sites of Cu<sub>4</sub>/WC surfaces. Carbon atoms of CO<sub>2</sub> and CO are represented by cyan spheres; tungsten, carbon and copper atoms are represented by silver, black and orange spheres, respectively. Vibrational frequencies are given for the TS where possible.
